# Supplementary material
Source: PubMed Central journal article supplement (PMC7518637)
Supplement: NIHMS1628320-supplement-Accepted_Supplementary_Material.pdf [file NIHMS1628320-supplement-Accepted_Supplementary_Material.pdf]

# SUPPLEMENTARY INFORMATION

## **Site-Specific Lysine Arylation as an Alternative Bioconjugation Strategy for Chemically Programmed Antibodies and Antibody-Drug Conjugates**

Dobeen Hwang,<sup>†</sup> Kohei Tsuji,<sup>‡</sup> HaJeung Park,<sup>§</sup> Terrence R. Burke, Jr.,<sup>‡</sup> and Christoph Rader<sup>†\*</sup>

<sup>†</sup>Department of Immunology and Microbiology, The Scripps Research Institute, Jupiter, FL 33458, USA

<sup>‡</sup>Chemical Biology Laboratory, Center for Cancer Research, National Cancer Institute, National Institutes of Health, Frederick, MD 21702, USA

<sup>§</sup>X-Ray Crystallography Core, The Scripps Research Institute, Jupiter, FL 33458, USA

\* Corresponding Author: Christoph Rader; e-mail [crader@scripps.edu](mailto:crader@scripps.edu); phone (561) 228-2053

## SUPPLEMENTARY EXPERIMENTAL PROCEDURES

### Synthesis of MS-PODA and $\beta$ -lactam hapten derivatives of folate and LLP2A

#### General methods

All experiments involving moisture-sensitive compounds were conducted under anhydrous conditions (positive argon pressure) using standard syringe, cannula, and septa apparatus. Commercial reagents were purchased from Sigma-Aldrich, TCI America, Acros, Chem-Impex, Ambeed, and Novabiochem. All solvents were purchased in anhydrous form (Sigma-Aldrich) and used without further drying. HPLC-grade hexanes, ethyl acetate (EtOAc), dichloromethane (DCM), and methanol were used in chromatography. Silica gel column chromatography employed a Teledyne CombiFlash Rf 200i instrument with either hexane/EtOAc or DCM/methanol gradients. NMR spectra were recorded using a Varian Inova 400 MHz instrument. Coupling constants are reported in Hertz (Hz), and peak shifts are reported in  $\delta$  (ppm) relative to  $\text{CDCl}_3$  ( $^1\text{H}$  7.26 ppm,  $^{13}\text{C}$  77.16 ppm). Low-resolution mass spectra (ESI) were measured with an Agilent 1200 series LC/MSD-SL system. High resolution mass spectra (HRMS) were obtained by positive ion, ESI analysis on a Thermo Fisher Scientific LTQ Orbitrap XL mass spectrometer with HPLC sample introduction using a short narrow-bore C18 reversed-phase (RP) column with acetonitrile (MeCN)- $\text{H}_2\text{O}$  gradients. Preparative HPLC purification was performed using a Waters 2545 binary pump (MeCN/ $\text{H}_2\text{O}$  gradient) with a Phenomenex Gemini-C<sub>18</sub> (5  $\mu\text{m}$ , 250 x 21 mm) preparative column and UV detection at 210 nm. Semi-preparative HPLC purification was performed using an Agilent 1200 series quaternary pump (MeCN/ $\text{H}_2\text{O}$  gradient) with a Phenomenex Kinetix-C<sub>18</sub> (5  $\mu\text{m}$ , 250 x 10 mm) semi-preparative column, 3 mL/min flow rate, and UV detection at 210 nm. Analytical HPLC analyses of purified peptides were performed using an Agilent 1200 series quaternary pump (MeCN/ $\text{H}_2\text{O}$  gradient) with a Phenomenex Gemini-C<sub>18</sub> (5  $\mu\text{m}$ , 250 x 4 mm) analytical column, 1 mL/min flow rate, and UV detection at 210 nm.

#### Synthesis of 2-(2-oxo-2-((4-(3-oxo-3-(2-oxoazetidin-1-yl)propyl)phenyl)amino)ethoxy)-*N*-(prop-2-yn-1-yl)acetamide (**14**)

The synthesis of  $\beta$ -lactam-hapten-alkyne **14** was achieved by coupling compounds **10** and **13** (Scheme S1). Compound **10** was prepared by treatment of diglycolic anhydride **9** with propargylamine. Compound **12** was synthesized according to literature procedures<sup>1</sup>, hydrogenated to the corresponding aniline-containing **13** and then subsequently used for coupling with **10** to afford **14**. In detail, to a solution of 1-(3-(4-nitrophenyl)propanoyl)azetidin-2-one (**12**) (100 mg, 0.40 mmol) in EtOAc (15 mL) was added Pd/C (10% (w/w), 43 mg, 0.040 mmol). The mixture was degassed *in vacuo* and then the vessel was charged with  $\text{H}_2$ . After stirring at RT for 6 h, the mixture was filtered through Celite and the filtrate was concentrated *in vacuo*. To a solution of the resulting crude **13** in dimethylformamide (DMF; 15 mL) was added hydroxybenzotriazole hydrate (HOBt- $\text{H}_2\text{O}$ ; 80 mg, 0.52 mmol), **10** (76 mg, 0.44 mmol), and 1-ethyl-3-(3-dimethylaminopropyl)carbodiimide hydrochloride (EDC-HCl; 85 mg, 0.44 mmol) and the mixture was stirred at RT for 2.5 h. DMF was removed by evaporation,  $\text{H}_2\text{O}$  was added,

and the mixture was extracted 3 times with chloroform (CHCl<sub>3</sub>). The organic layer was washed with brine, dried (Na<sub>2</sub>SO<sub>4</sub>) and the crude material was purified by silica gel CombiFlash chromatography (hexane/EtOAc gradient, 0-100% over 30 min) to afford **14** as an off-white powder (89 mg, 59%, 2 steps from **12**). <sup>1</sup>H NMR (400 MHz, chloroform-d) δ 8.38 (s, 1H), 7.47 (d, J = 8.4 Hz, 2H), 7.20 (d, J = 8.4 Hz, 2H), 6.81 (s, 1H), 4.15 – 4.11 (m, 6H), 3.56 (t, J = 5.3 Hz, 2H), 3.04 – 2.93 (m, 6H), 2.26 (t, J = 2.5 Hz, 1H). <sup>13</sup>C NMR (101 MHz, chloroform-d) δ 170.21, 168.34, 166.56, 165.14, 137.15, 135.19, 129.27, 120.53, 79.10, 72.11, 71.64, 71.27, 38.14, 36.65, 36.01, 29.54, 28.92. HR-MS (ESI+) calculated for C<sub>19</sub>H<sub>22</sub>N<sub>3</sub>O<sub>5</sub>: 372.1554 [M+H]<sup>+</sup>; found: 372.1552.

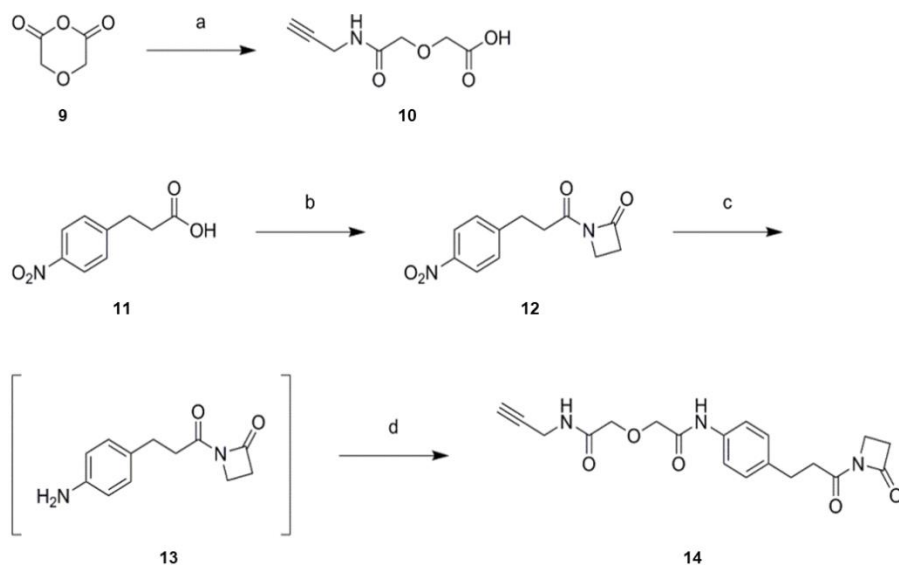

**Scheme S1.** Synthesis of compound **14**. (a) Propargylamine, THF, RT, 1 d, 43%; (b) thionyl chloride, 0°C to 60°C, 1.5 h then azetidin-2-one, *n*-BuLi, THF, -78°C to RT, overnight, 24%; (c) Pd/C, H<sub>2</sub>, EtOAc, RT, 6 h; (d) **10**, EDC·HCl, HOBt·H<sub>2</sub>O, DMF, 2.5 h, 59% (2 steps from **12**).

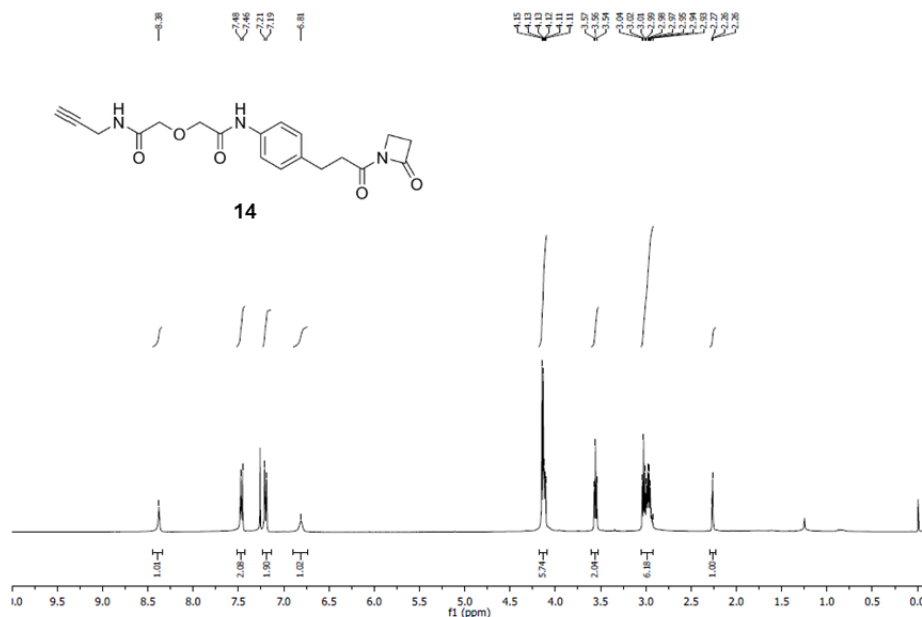

**Spectrum 1.**  $^1\text{H-NMR}$  of compound **14**.

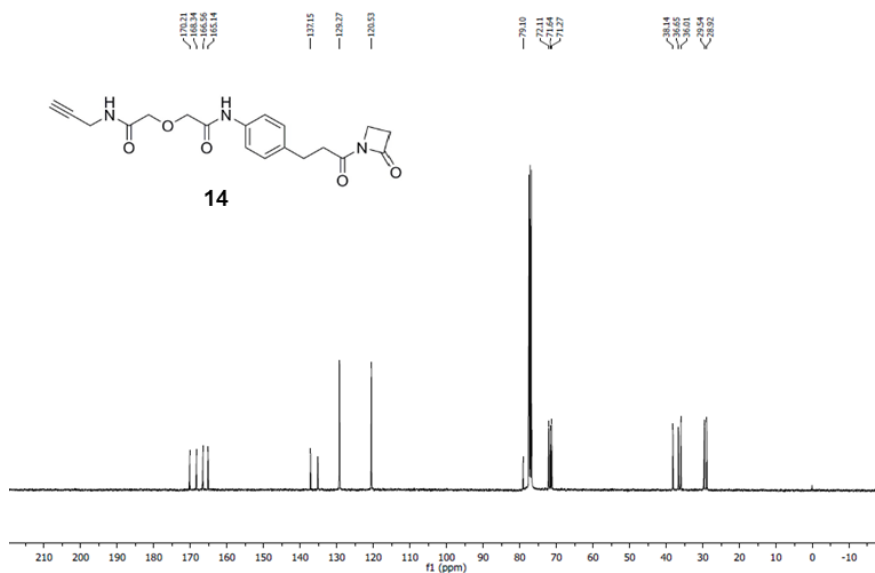

**Spectrum 2.**  $^{13}\text{C-NMR}$  of compound **14**.

### General procedure for solid-phase peptide synthesis (SPPS)

SPPS resin was pre-swollen in *N*-methyl-2-pyrrolidone (NMP) with shaking (20 min). Sieber Amide resin (Novabiochem, 0.71 mmol/g) was utilized for certain peptides and the loading procedure is described where applicable. On-resin fluorenylmethyloxycarbonyl (Fmoc) deprotection was achieved using 20% (v/v) piperidine in DMF with shaking (10 min). Fmoc-protected amino acids (2.0 – 4.0 eq based on resin) were dissolved in NMP and pre-activated by the addition of HATU (0.95

mole-eq relative to the amino acid) and DIEA (2.0 mole-eq relative to the amino acid) with shaking (1 min). The resin was washed with NMP, and the solution of HATU-activated amino acid was added to the washed resin. Coupling reactions were shaken at RT and allowed to proceed from 2 h to overnight, depending on the eq used and steric bulk of the amino acid. Coupling reactions were routinely checked for completion using a Kaiser test. Once completed, the resin was filtered and washed with NMP, followed by Fmoc-deprotection using 20% (v/v) piperidine in DMF with shaking (10 min). Cleavage of the Lys  $\epsilon$ -amine Dde group was performed by treatment with 2% (v/v) hydrazine monohydrate in NMP (2 h, twice) with allyl alcohol (200 eq based on resin) for peptides **17** and **6**. Deprotection of the Lys  $\epsilon$ -amine Alloc group was performed by treatment with Pd(PPh<sub>3</sub>)<sub>4</sub> (0.30 eq based on resin) and PhSiH<sub>3</sub> (10 eq based on resin) in CHCl<sub>3</sub>, which was well-degassed by bubbling with argon gas (20 min, 3 times). Following Alloc-deprotection, the resin was treated with 0.50% (w/v) sodium diethyldithiocarbamate trihydrate in DMF (20 min, 3 times) to scavenge residual Pd metal. Coupling with diglycolic anhydride **9** was performed in the presence of *N,N*-diisopropylethylamine (DIEA; 4.0 eq based on resin) in NMP (3 h) and the resin was subsequently coupled with 4-(5-(methylsulfonyl)-1,3,4-oxadiazol-2-yl)aniline (**18**, Ambeed, 2.0 eq based on resin) using HATU (0.95 mole-eq relative to the amino acid) and DIEA (2.0 mole-eq relative to the amino acid) with shaking (RT, 3 to 4 h). Cleavage of the finished resin with global deprotection was performed using a cocktail of trifluoroacetic acid (TFA)/triisopropylsilane (TIPS)/H<sub>2</sub>O = 95:2.5:2.5 (4.0 mL, 2 h). The mixture was filtered, and the filtrate was added to cold diethyl ether (Et<sub>2</sub>O). The resulting precipitate was washed with cold Et<sub>2</sub>O (3 times). Crude peptides were dissolved in 0.1% TFA containing MeCN and H<sub>2</sub>O and purified using preparative RP-HPLC. Further purification was conducted using semi-preparative RP-HPLC when needed. HPLC eluents were A: 0.1% TFA in H<sub>2</sub>O; B: 0.1% TFA in MeCN.

### General procedure for Cu-catalyzed azide-alkyne cycloaddition reactions

Azido-containing peptides targeting either FOLR1 or integrin  $\alpha_4\beta_1$  (1.0 eq) were dissolved in H<sub>2</sub>O (5.0 mM) and mixed with **14** (1.1 eq) in DMSO (5.0 mM based on the peptide). Separately, 4.0% (w/v) CuSO<sub>4</sub>·5H<sub>2</sub>O in H<sub>2</sub>O (0.13 eq), 0.10 M tris[(1-benzyl-1H-1,2,3-triazol-4-yl)methyl]amine (TBTA) in DMSO (0.25 eq), and 0.50 M sodium ascorbate in H<sub>2</sub>O (5.0 eq) were combined and the mixture was added to the peptide solution and incubated in the dark (1 to 6 d). The resulting crude peptide was purified using preparative RP-HPLC using gradients consisting of A: 0.1% TFA in H<sub>2</sub>O; B: 0.1% TFA in MeCN.

### Synthesis of azido-folate and azido-LLP2A peptides

The synthesis of azido peptides targeting either FOLR1 or integrin  $\alpha_4\beta_1$  were conducted using standard Fmoc-based solid phase peptide synthesis (SPPS) protocols using Fmoc-L-Lys(Dde)-OH, which can be selectively deprotected by treatment with hydrazine and functionalized at the final step of peptide resin construction (**Scheme S2**). Folate-containing peptide (**16**) was synthesized from Sieber Amide resin (Novabiochem, 0.71 mmol/g)-bound peptide (**15**) using a TFA-protected pteric acid analog having an  $\alpha$ -protected glutamic acid residue.<sup>2</sup> Following removal of the Lys  $\epsilon$ -amine Dde protecting group with 2% (v/v) hydrazine monohydrate in NMP, the azide group was incorporated by coupling with azidoacetic acid. The finished resin was cleaved with a TFA cocktail

and purified by RP-HPLC using gradients consisting of A: 0.1% TFA in H<sub>2</sub>O; B: 0.1% TFA in MeCN to afford **16** (**Scheme S2**). The LLP2A-containing peptide (**17**) was synthesized from Sieber Amide resin (Novabiochem, 0.71 mmol/g)-bound peptide (**15**) by sequentially coupling with Fmoc-1-aminocyclohexane carboxylic acid (Fmoc-Ach-OH), Fmoc-L- $\alpha$ -amino adipic acid  $\delta$ -tert-butyl ester (Fmoc-L-Aad(Ot-Bu)-OH), and Fmoc-L-Lys(Alloc)-OH. The resulting resin was coupled with 4-(*N*'-(2-methylphenyl)urea)phenylacetic acid (MPUPA) NHS ester, and then the Alloc group was selectively removed by treatment with Pd(PPh<sub>3</sub>)<sub>4</sub>/PhSiH<sub>3</sub>, followed by coupling with *trans*-3-(3-pyridyl)-acrylic acid.<sup>3</sup> The Lys  $\epsilon$ -amine Dde protecting group was removed by treating with 2% (v/v) hydrazine in NMP in the presence of allyl alcohol (200 eq) to avoid undesired hydrogenation of acrylic acid moiety.<sup>4</sup> The azide group was subsequently incorporated by treatment with azidoacetic acid and the finished resin was treated with a TFA cocktail and purified by RP-HPLC using gradients consisting of A: 0.1% TFA in H<sub>2</sub>O; B: 0.1% TFA in MeCN to obtain peptide (**17**) (**Scheme S2**).

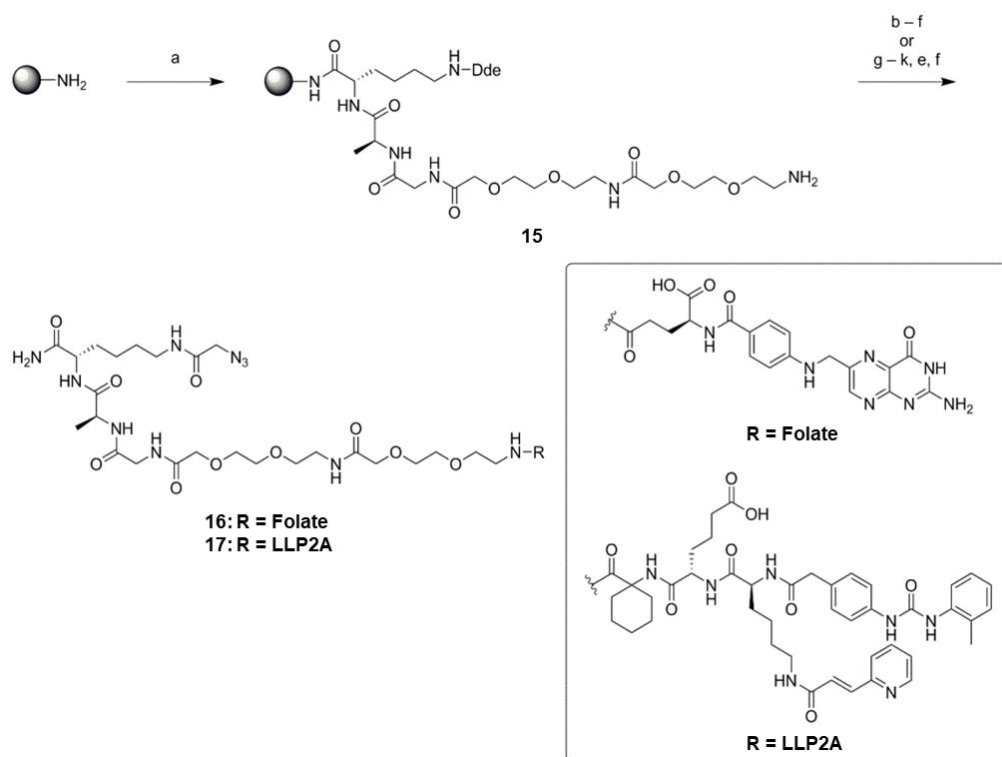

**Scheme S2.** Synthesis of azido peptides targeting either FOLR1 (**16**) or integrin  $\alpha_4\beta_1$  (**17**). (a) Fmoc-SPPS; (b) Fmoc-L-Glu(OH)-Ot-Bu, HATU, DIEA, NMP then 20% (v/v) piperidine in DMF; (c) *N*-10-TFA-pteronic acid, HATU, DIEA, NMP; (d) 2% (v/v) hydrazine monohydrate in NMP; (e) azidoacetic acid NHS ester, DIEA, NMP; (f) TFA/TIPS/H<sub>2</sub>O = 95:2.5:2.5; (g) Fmoc-SPPS using Fmoc-Ach-OH, Fmoc-L-Aad(Ot-Bu)-OH, and Fmoc-L-Lys(Alloc)-OH; (h) MPUPA-NHS ester, DIEA, NMP; (i) Pd(PPh<sub>3</sub>)<sub>4</sub>, PhSiH<sub>3</sub>, CHCl<sub>3</sub>; (j) *trans*-3-(3-pyridyl)-acrylic acid, HATU, DIEA, NMP; (k) 2% (v/v) hydrazine monohydrate in NMP, allyl alcohol.

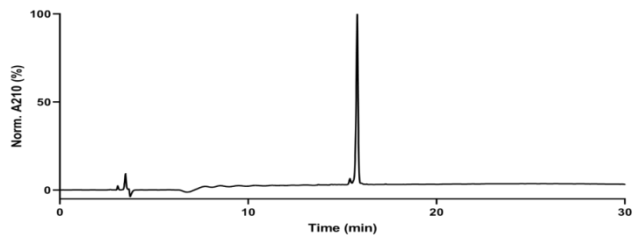

**Chromatogram 1.** Analytical HPLC of azido-folate peptide **16**. Analytical HPLC conditions: linear gradient elution (1 to 50% of B in A over 30 min).

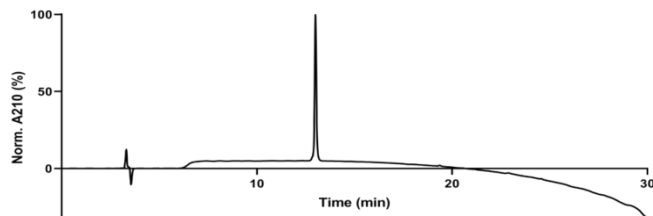

**Chromatogram 2.** Analytical HPLC of azido-LLP2A peptide **17**. Analytical HPLC conditions: linear gradient elution (10 to 100% of B in A over 30 min).

### Synthesis of $\beta$ -lactam-hapten-folate **3** and $\beta$ -lactam-hapten-LLP2A **4**

Compounds **3** and **4** (**Figure 4**) were synthesized utilizing Cu-catalyzed azide-alkyne cycloaddition reactions of azido peptides **16** and **17**, respectively, and **14** (**Scheme S3**).

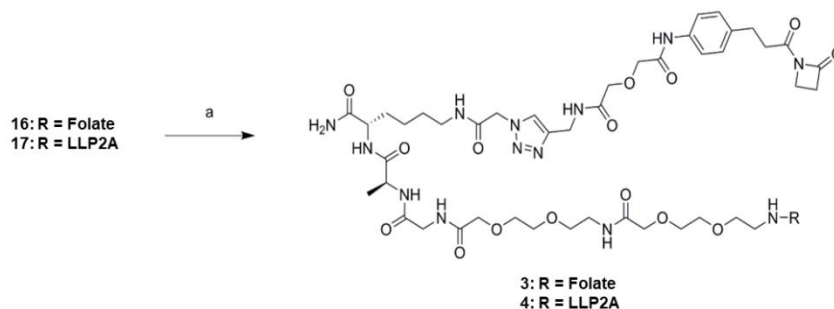

**Scheme S3.** Synthesis of  $\beta$ -lactam-hapten-folate **3** and  $\beta$ -lactam-hapten-LLP2A **4**. (a) **14**,  $\text{CuSO}_4 \cdot 5\text{H}_2\text{O}$ , TBTA, sodium ascorbate,  $\text{DMSO}/\text{H}_2\text{O} = 1:1$ , 54% for **3** and 66% for **4**.

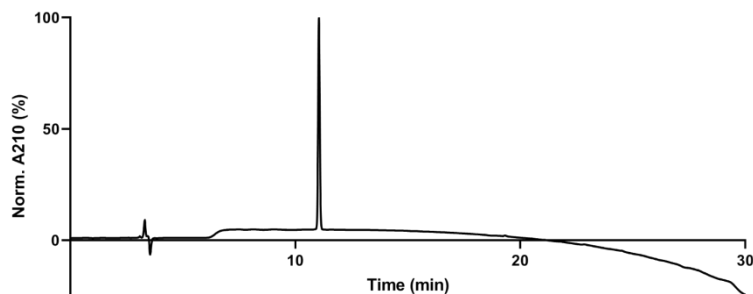

**Chromatogram 3.** Analytical HPLC of  $\beta$ -lactam-hapten-folate **3**. Analytical HPLC conditions: linear gradient elution (10 to 100% of B in A over 30 min).

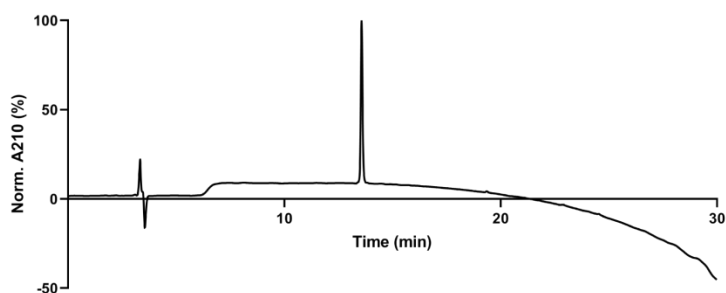

**Chromatogram 4.** Analytical HPLC of  $\beta$ -lactam-hapten-LLP2A **4**. Analytical HPLC conditions: linear gradient elution (10 to 100% of B in A over 30 min).

### Synthesis of MS-PODA-folate **5** and MS-PODA-LLP2A **6**

Compounds **5** and **6** (**Figure 4**) were synthesized by procedures described above for the synthesis of **16** and **17**, except that following the removal of the Lys  $\epsilon$ -amine Dde protecting group, coupling was performed with the diglycolic anhydride **9** and the commercially available MS-PODA aniline derivative **18** rather than with azidoacetic acid NHS ester (**Scheme S4**).



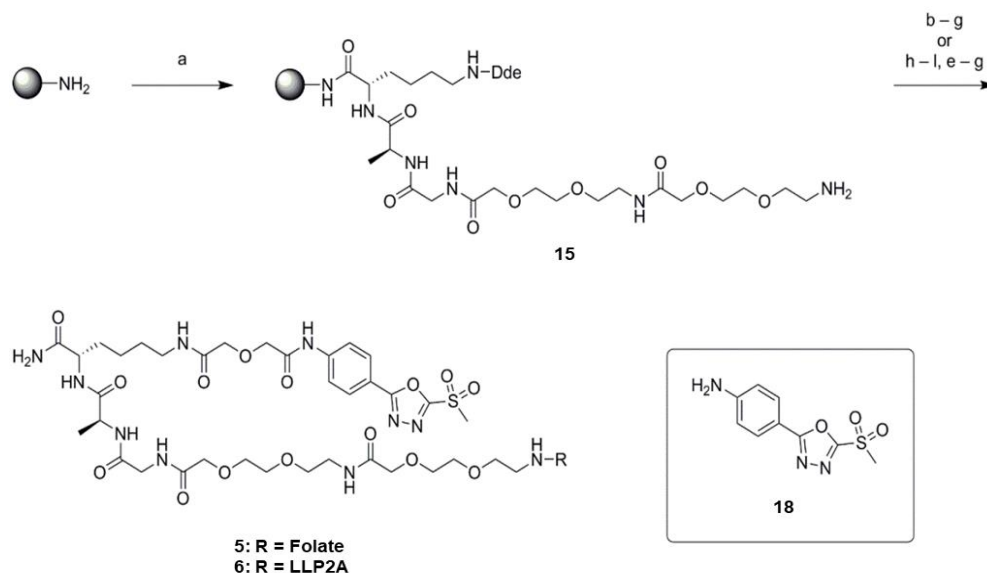

**Scheme S4.** Synthesis of MS-PODA-folate **5** and MS-PODA-LLP2A **6**. (a) Fmoc-SPPS; (b) Fmoc-L-Glu(OH)-O*t*-Bu, HATU, DIEA, NMP then 20% (v/v) piperidine in DMF; (c) *N*-10-TFA-ptericoic acid, HATU, DIEA, NMP; (d) 2% (v/v) hydrazine monohydrate in NMP; (e) diglycolic anhydride, DIEA, NMP; (f) **18**, HATU, DIEA, NMP; (g) TFA/TIPS/H<sub>2</sub>O = 95:2.5:2.5; (h) Fmoc-SPPS using Fmoc-Ach-OH, Fmoc-L-Adp(O*t*-Bu)-OH, and Fmoc-L-Lys(Alloc)-OH; (i) MPUPA-NHS ester, DIEA, NMP; (j) Pd(PPh<sub>3</sub>)<sub>4</sub>, PhSiH<sub>3</sub>, CHCl<sub>3</sub>; (k) *trans*-3-(3-pyridyl)-acrylic acid, HATU, DIEA, NMP; (l) 2% (v/v) hydrazine monohydrate in NMP, allyl alcohol.

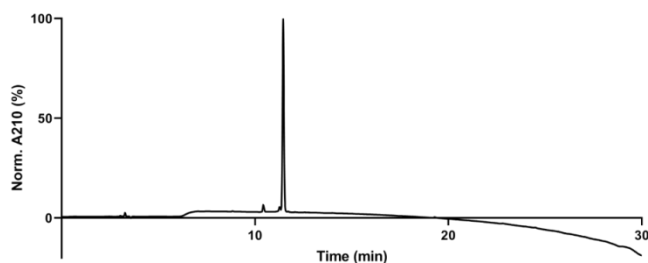

**Chromatogram 5.** Analytical HPLC of MS-PODA-folate **5**. Analytical HPLC conditions: linear gradient elution (10 to 100% of B in A over 30 min).

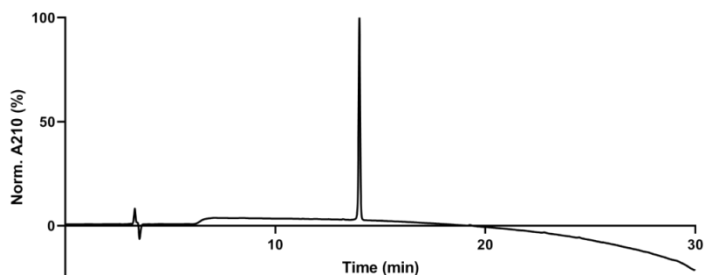

**Chromatogram 6.** Analytical HPLC of MS-PODA-LLP2A **6**. Analytical HPLC conditions: linear gradient elution (10 to 100% of B in A over 30 min).

**Table S1.** Mass spectrometry analysis results and preparative and semi-preparative HPLC conditions of compounds **3–6**, **16**, and **17**.

|           | Calculated molecular weight (Da) | Found molecular weight (Da) | Preparative HPLC gradient       | Semi-preparative HPLC gradient  |
|-----------|----------------------------------|-----------------------------|---------------------------------|---------------------------------|
| <b>16</b> | 1070.5<br>[M + H] <sup>+</sup>   | 1070.3                      | 10 to 30% of B in A over 30 min |                                 |
| <b>17</b> | 720.9<br>[M + 2H] <sup>2+</sup>  | 720.8                       | 25 to 35% of B in A over 30 min |                                 |
| <b>3</b>  | 721.3<br>[M + 2H] <sup>2+</sup>  | 721.3                       | 10 to 40% of B in A over 30 min |                                 |
| <b>4</b>  | 906.4<br>[M + 2H] <sup>2+</sup>  | 906.4                       | 20 to 45% of B in A over 30 min |                                 |
| <b>5</b>  | 1324.5<br>[M + H] <sup>+</sup>   | 1324.3                      | 5 to 50% of B in A over 30 min  | 10 to 40% of B in A over 30 min |
| <b>6</b>  | 1694.7<br>[M + H] <sup>+</sup>   | 1694.5                      | 5 to 55% of B in A over 30 min  | 15 to 45% of B in A over 30 min |

## SUPPLEMENTARY FIGURES

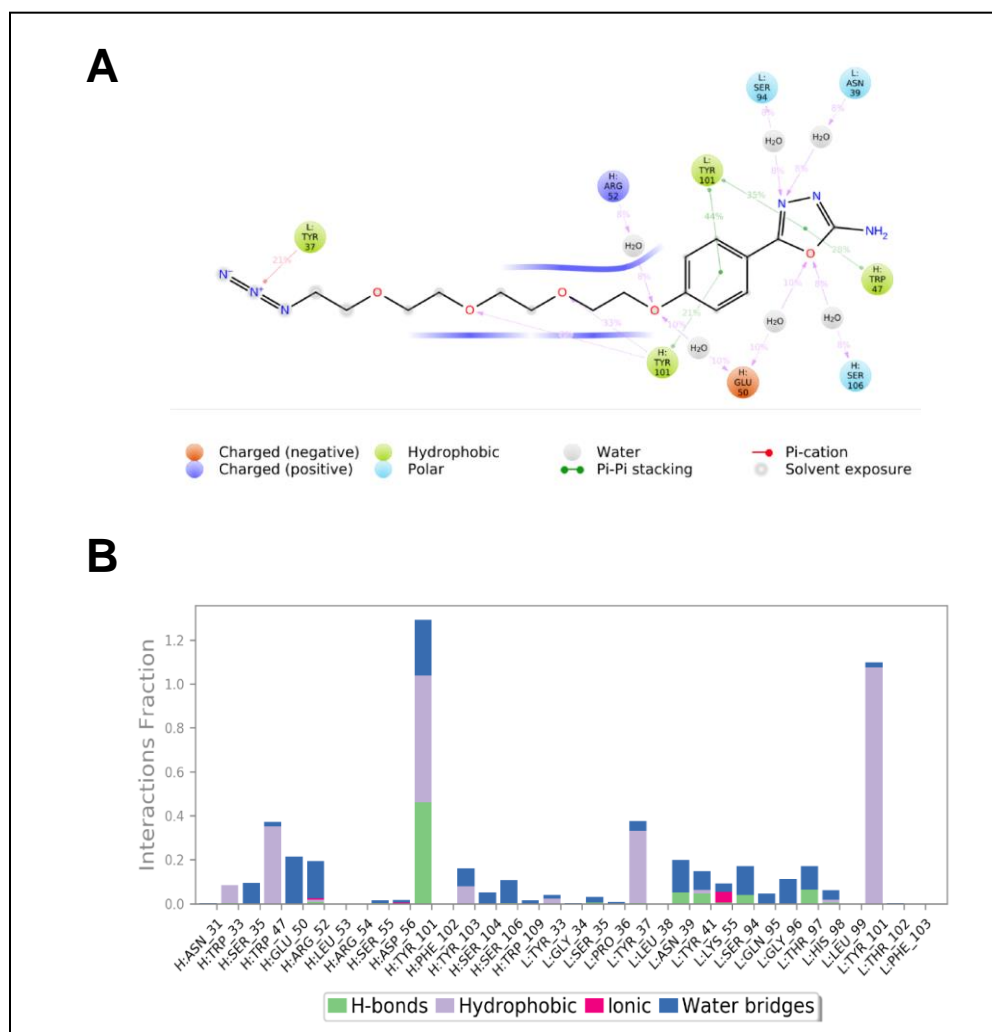

**Supplementary Figure S1. Small molecule-antibody interactions in the *in silico* docking model of PODA-conjugated Lys99.** (A) Starting with the crystal structure of h38C2\_Arg Fab (PDB ID 6U85), Arg99 was replaced with an azido-(PEG)<sub>4</sub>-PODA-derivatized Lys residue and subjected to energy minimization *in silico*. Shown are interactions that occur more than 8.0% of the simulation time in the selected trajectory (1.02 through 30.00 ns). (B) Small molecule-antibody interactions were categorized into the four types shown and displayed as stacked bar chart for each interacting V<sub>H</sub> or V<sub>L</sub> residue. The stacked bar charts are normalized over the course of the trajectory with a value of 1.0 suggesting that 100% of the simulation time the specific interaction is maintained. Tyr101 of V<sub>H</sub> and Tyr 101 of V<sub>L</sub> have values over 1.0 due to their multiple contacts shown in (A).

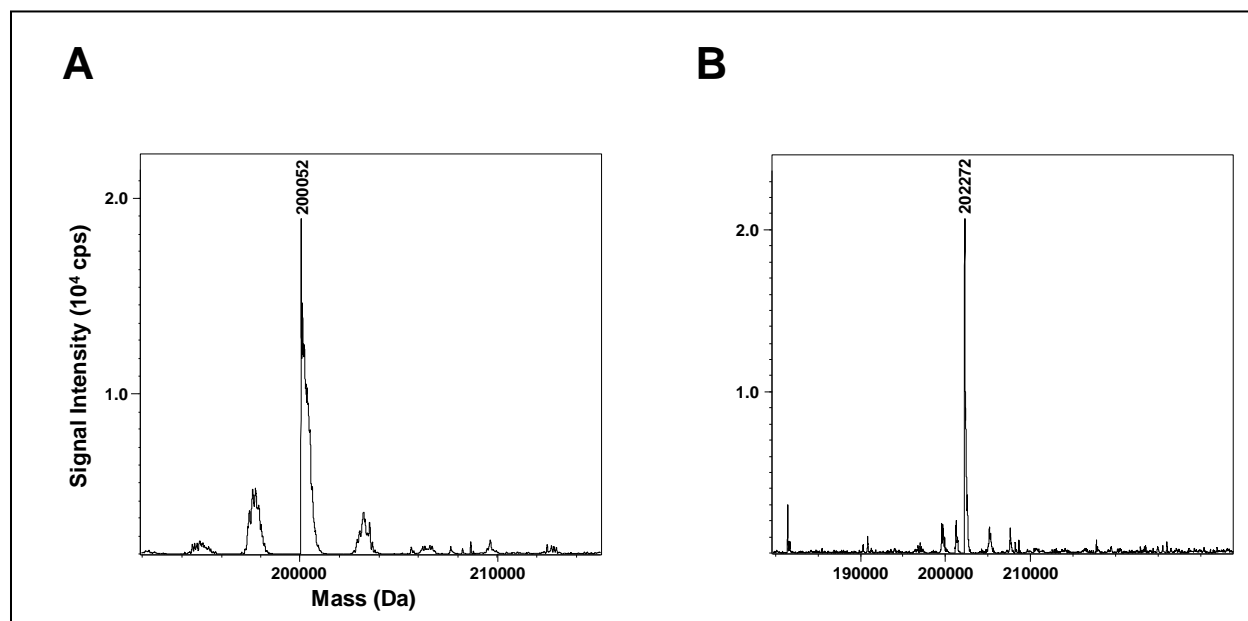

**Supplementary Figure S2. Mass spectrometry analysis of nonreduced anti-HER2 DVD-ADC.** MALDI-TOF analysis of the nonreduced and deglycosylated (PNGase F) unconjugated (**A**) and compound **8**-conjugated (**B**) anti-HER2 DVD-IgG1. The expected mass for the unconjugated DVD-IgG1 was 200,106 Da. The expected mass for the DVD-IgG1 with one conjugated compound **8** was 202,310 Da.

## SUPPLEMENTARY REFERENCES

- [1] Magano, J., Bock, B., Brennan, J., Farrand, D., Lovdahl, M., Maloney, M. T., Nadkarni, D., Oliver, W. K., Pozzo, M. J., Teixeira, J. J., et al. (2014) Chromatography- and lyophilization-free synthesis of a peptide-linker conjugate. *Org. Process Res. Dev.* **18**, 142-151.
- [2] Walseng, E., Nelson, C. G., Qi, J., Nanna, A. R., Roush, W. R., Goswami, R. K., Sinha, S. C., Burke, T. R., Jr., and Rader, C. (2016) Chemically programmed bispecific antibodies in diabody format. *J. Biol. Chem.* **291**, 19661-19673.
- [3] Thomas, J. D., Cui, H., North, P. J., Hofer, T., Rader, C., and Burke, T. R., Jr. (2012) Application of strain-promoted azide-alkyne cycloaddition and tetrazine ligation to targeted Fc-drug conjugates. *Bioconjug. Chem.* **23**, 2007-2013.
- [4] Rohwedder, B., Mutti, Y., Dumy, P., and Mutter, M. (1998) Hydrazinolysis of Dde: complete orthogonality with Alloc protecting groups. *Tetrahedron Lett.* **39**, 1175-1178.
